# Supplementary material for: (FeMnCe)-co-doped MOF-74 with significantly improved performance for overall water splitting
Source: Royal Society of Chemistry journal article supplement (doi:10.1039/d3dt01892j), 2023-01-01
Supplement: d3dt01892j1.pdf [file d3dt01892j1.pdf]

## Supporting Information

### **(FeMnCe)-co-doped MOF-74 with significantly improved performance for overall water splitting**

Ning Chai <sup>a</sup>, Yuxuan Kong <sup>a</sup>, Tian Liu <sup>a</sup>, Shuanglu Ying <sup>a</sup>, Qiao Jiang <sup>a</sup>, and Fei-Yan

Yi <sup>\*a, b</sup>

<sup>a</sup> School of Materials Science and Chemical Engineering, Ningbo University, Ningbo,

Zhejiang, 315211, P. R. China, E-mail: yifeiyan@nbu.edu.cn

<sup>b</sup> Key Laboratory of Photoelectric Detection Materials and Devices of Zhejiang

Province, Ningbo, 315211, P. R. China.

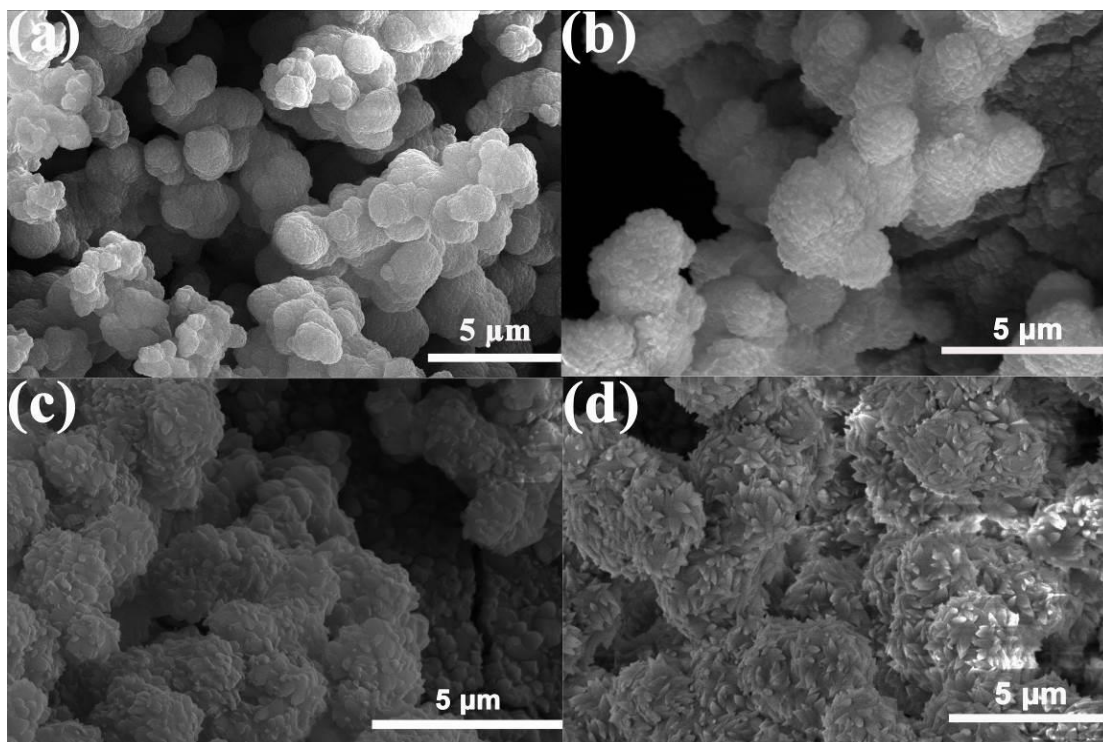

**Fig. S1** SEM of (a)Fe-MOF-74/NF, (b)FeCe<sub>0.5</sub>-MOF-74/NF, (c)FeCe<sub>1</sub>-MOF-74/NF, (d)FeCe<sub>2</sub>-MOF-74/NF

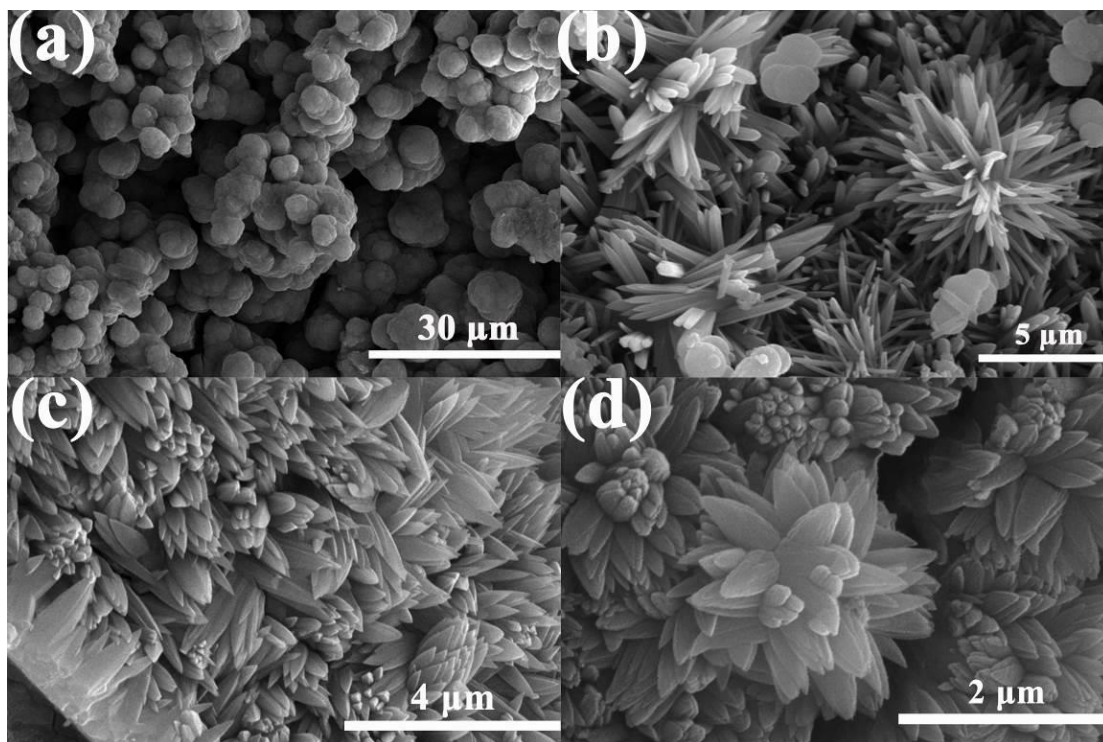

**Fig. S2** SEM of (a)Mn-MOF-74/NF, (b)Mn<sub>6</sub>Ce<sub>0.5</sub>-MOF-74/NF, (c)Mn<sub>6</sub>Ce<sub>1</sub>-MOF-74/NF, (d)Mn<sub>6</sub>Ce<sub>2</sub>-MOF-74/NF

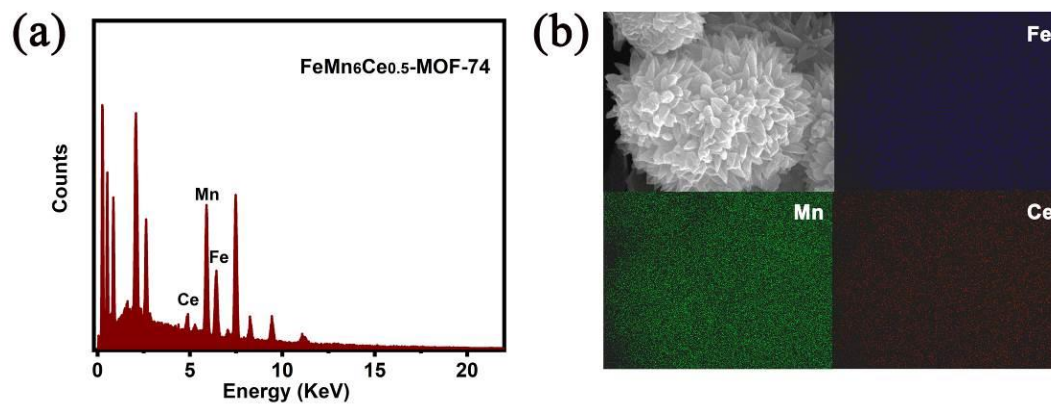

**Fig. S3** (a) EDX patterns of FeMn<sub>6</sub>Ce<sub>0.5</sub>-MOF-74/NF; (b) elemental mapping of FeMn<sub>6</sub>Ce<sub>0.5</sub>-MOF-74/NF

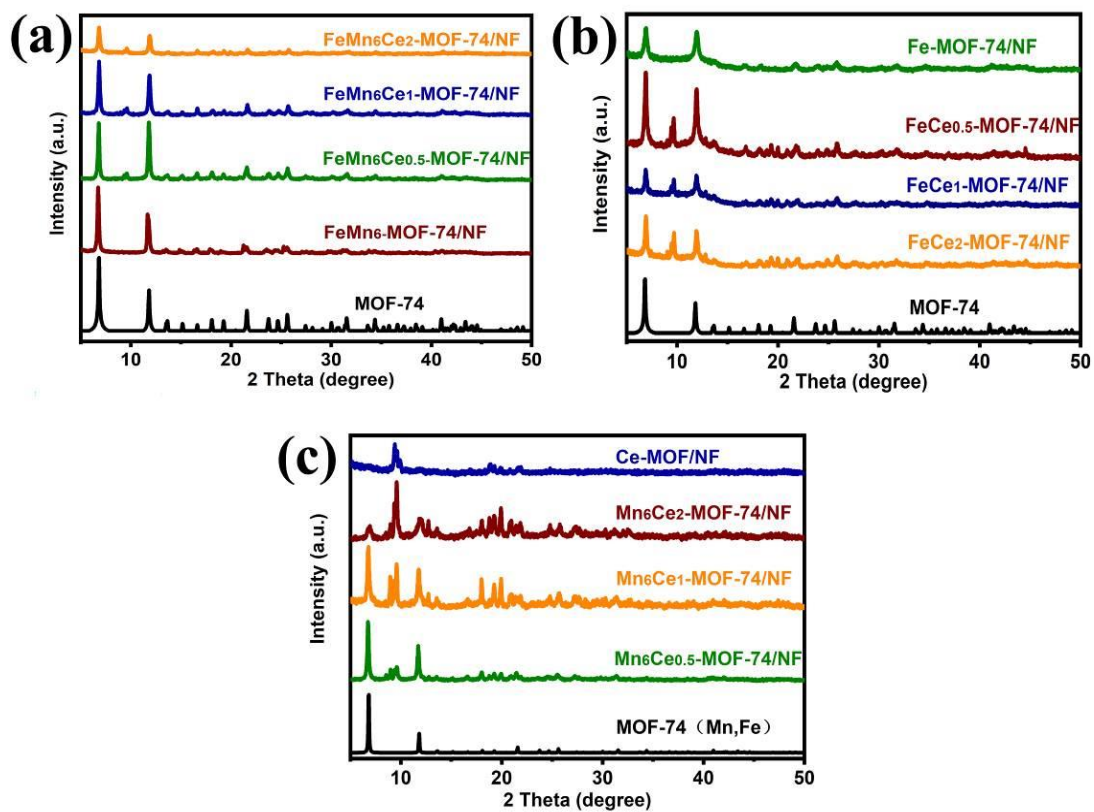

**Fig. S4** XRD patterns of (a) (FeMnCe)-MOF-74 series; (b) FeCe-MOF-74 series and (c) MnCe-MOF-74 series.

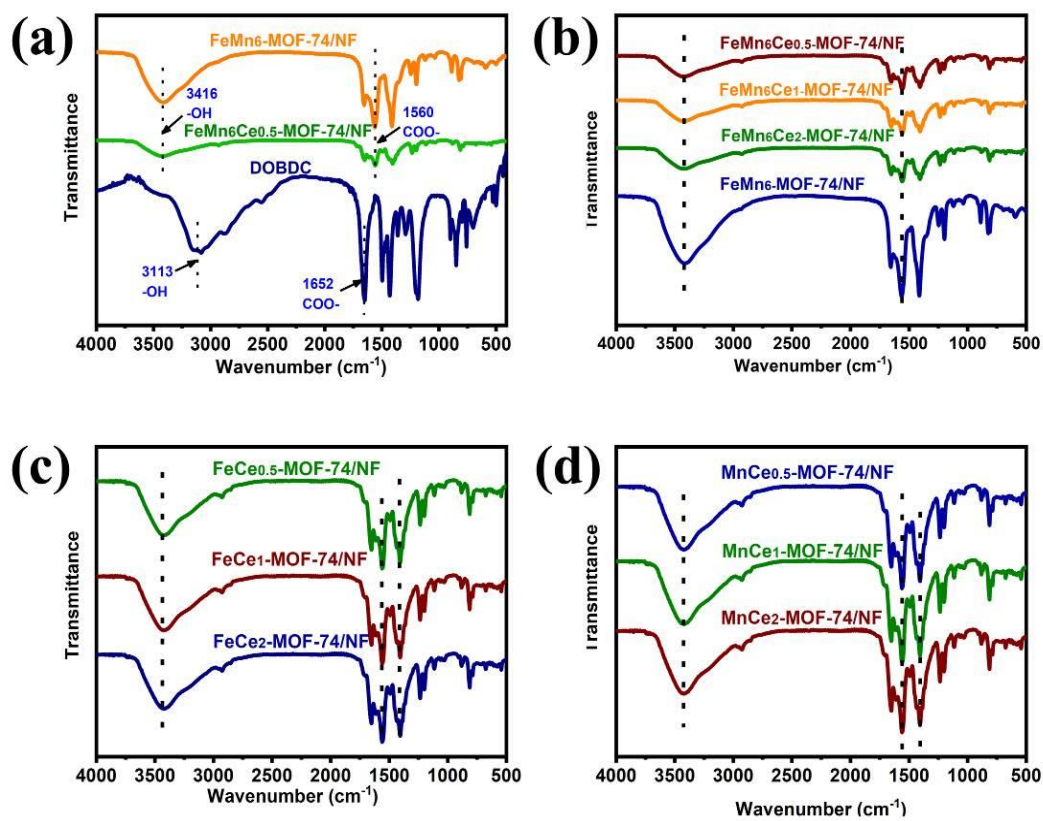

**Fig. S5** FT-IR patterns of (a)  $\text{FeMn}_6\text{-MOF-74/NF}$ ,  $\text{FeMn}_6\text{Ce}_{0.5}\text{-MOF-74/NF}$ , and ligand DOBDC; (b)  $(\text{FeMnCe})\text{-MOF-74}$  series; (c)  $\text{FeCe-MOF-74}$  series and (d)  $\text{MnCe-MOF-74}$  series.

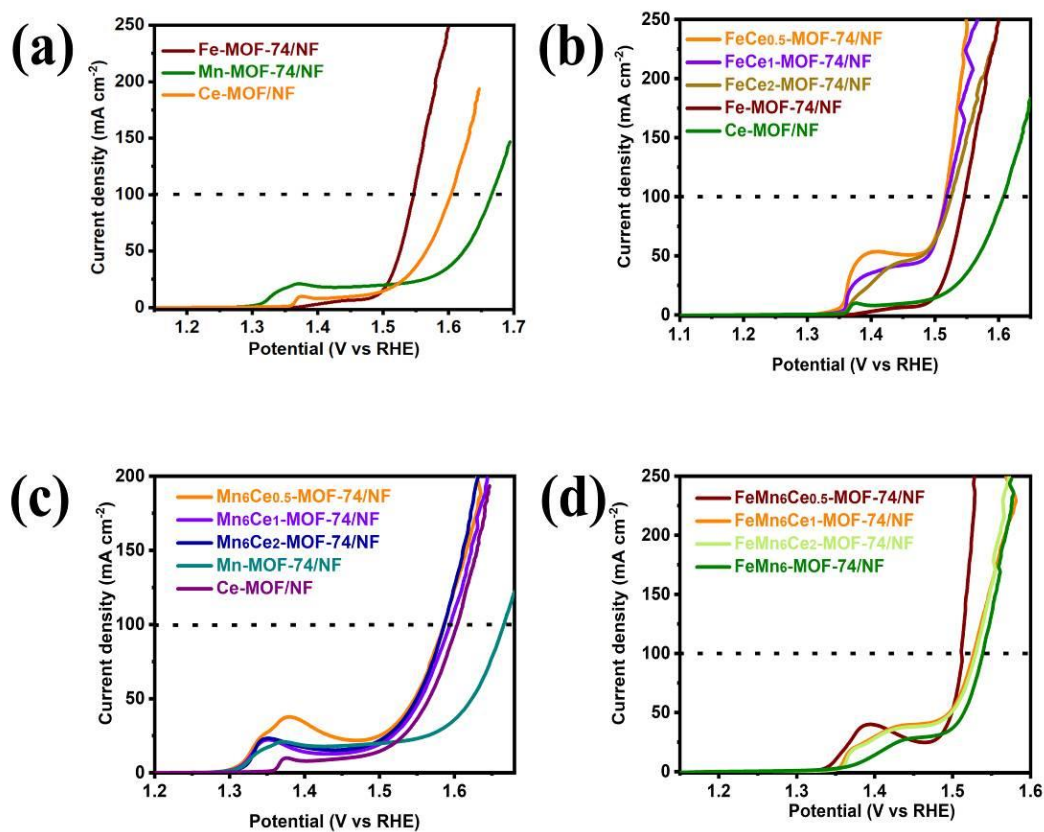

**Fig. S6** OER performances of all as-prepared materials in 1 M KOH. The LSV plots of (a) single metal-MOF-74; (b) FeCe-MOF-74 series; (c) MnCe-MOF-74 series and (d) (FeMnCe)-MOF-74 series.

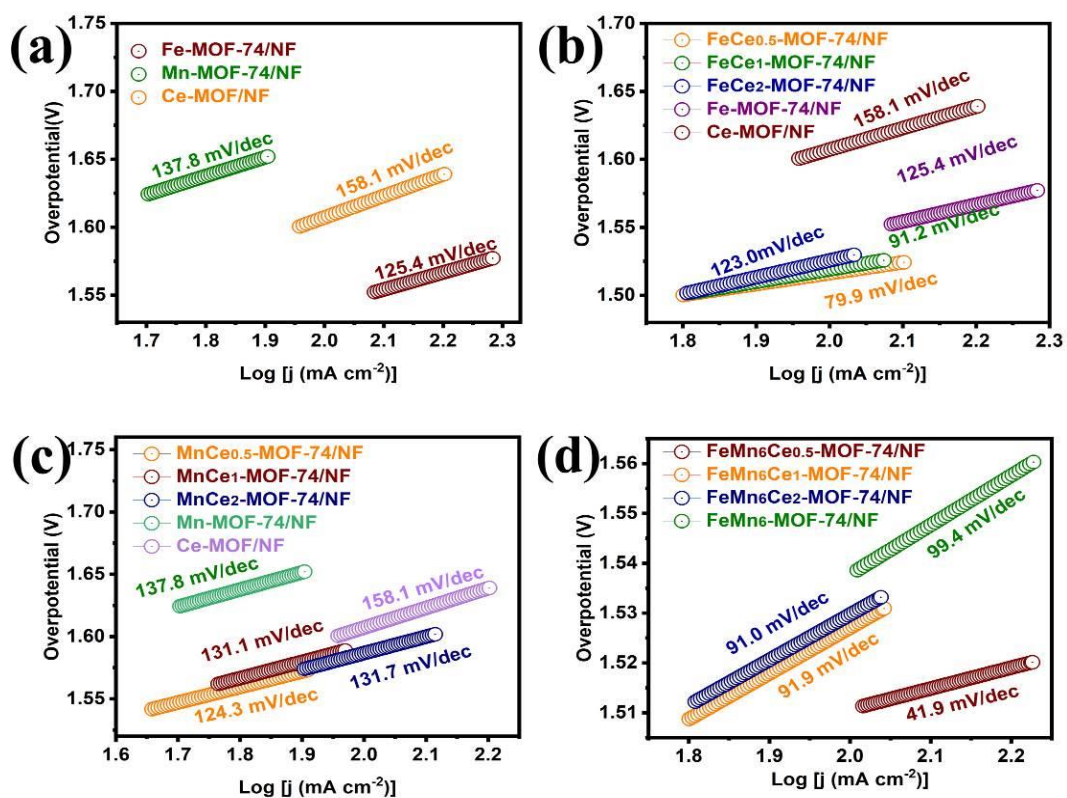

**Fig. S7** OER performances of all as-prepared materials in 1 M KOH. Tafel plots of (a) single metal-MOF-74; (b) FeCe-MOF-74 series; (c) MnCe-MOF-74 series and (d) (FeMnCe)-MOF-74 series.



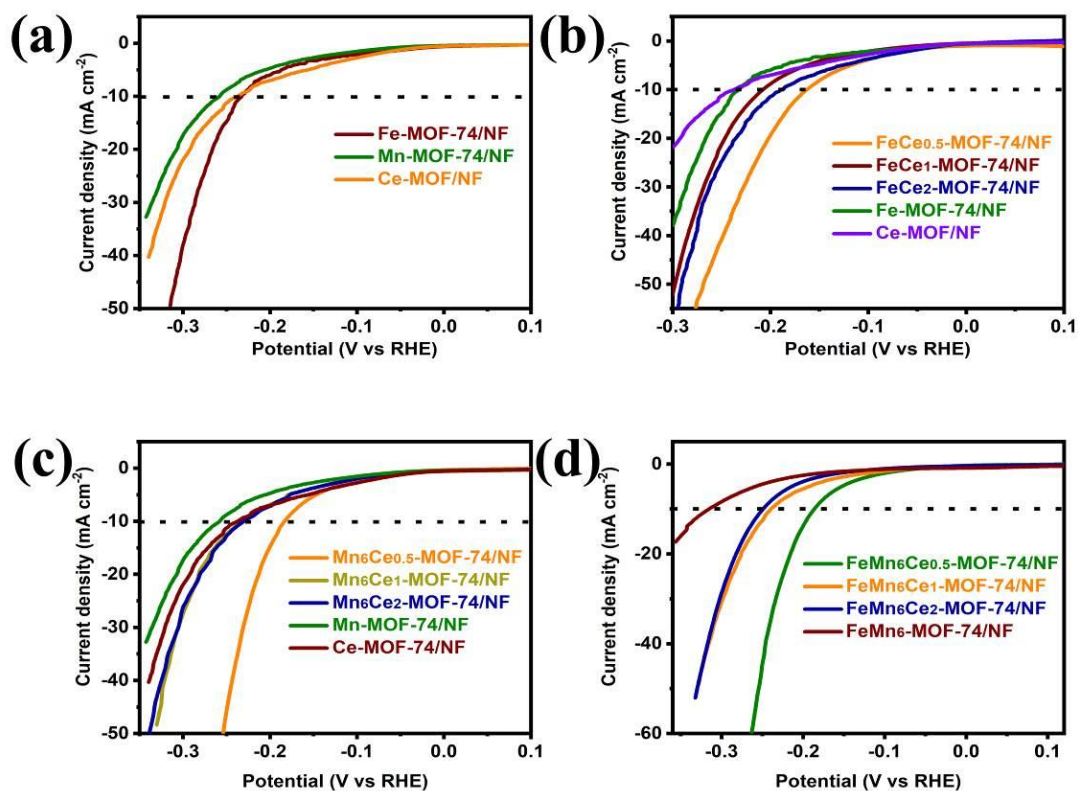

**Fig. S8** HER performances of all as-prepared materials in 1 M KOH. The LSV plots of (a) single metal-MOF-74; (b) FeCe-MOF-74 series; (c) MnCe-MOF-74 series and (d) (FeMnCe)-MOF-74 series.

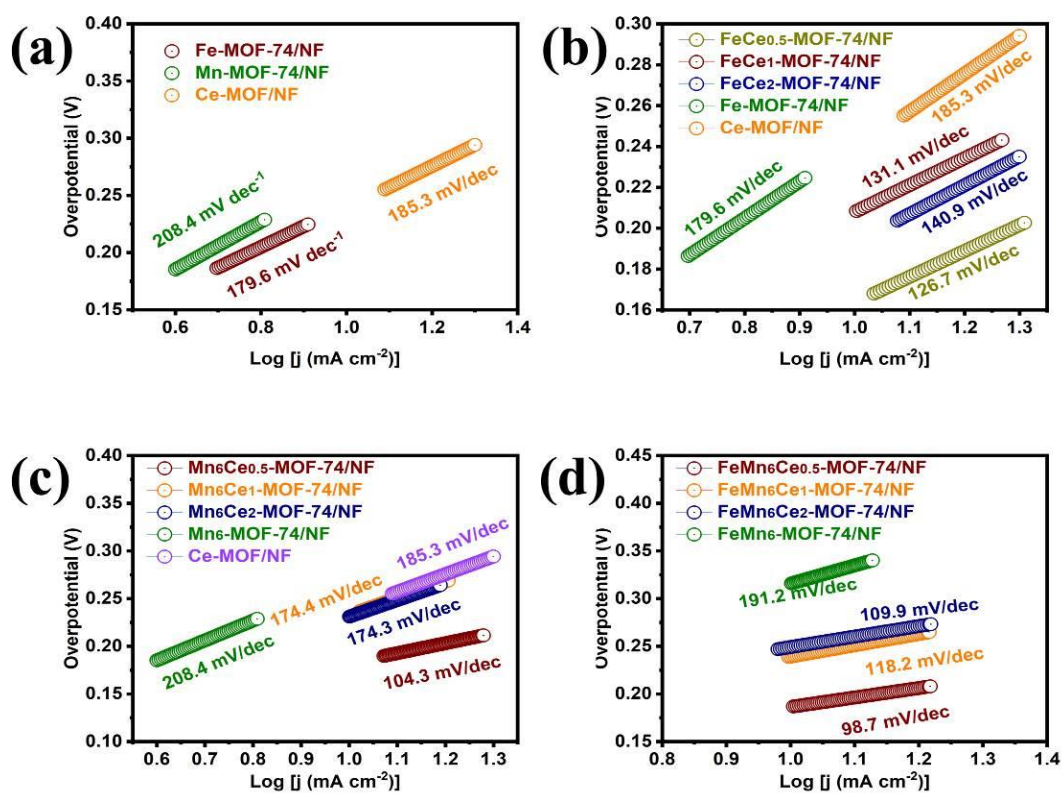

**Fig. S9** HER performances of all as-prepared materials in 1 M KOH. Tafel plots of (a) single metal-MOF-74; (b) FeCe-MOF-74 series; (c) MnCe-MOF-74 series and (d) (FeMnCe)-MOF-74 series.

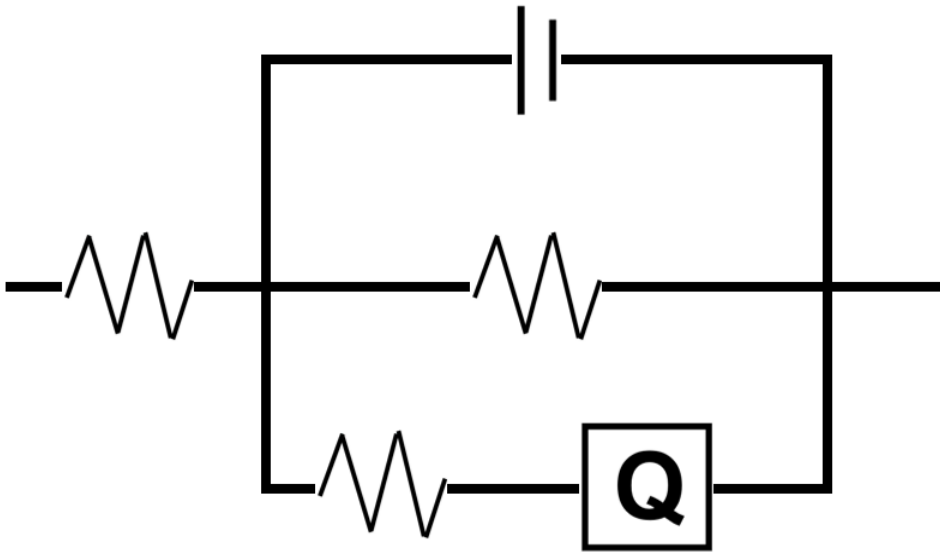

**Fig. S10** The equivalent circuit model for electrochemical impedance tests.

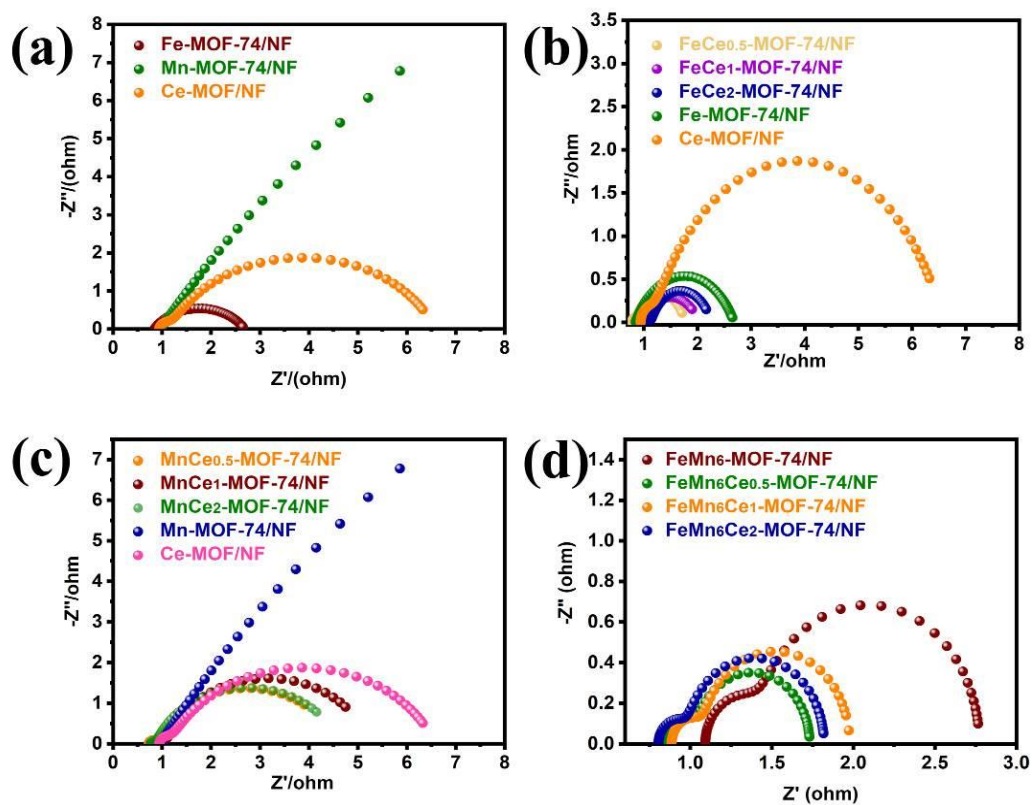

**Fig. S11** OER performances of all as-prepared materials in 1 M KOH. Nyquist plots of (a) single metal-MOF-74; (b) FeCe-MOF-74 series; (c) MnCe-MOF-74 series and (d) (FeMnCe)-MOF-74 series.

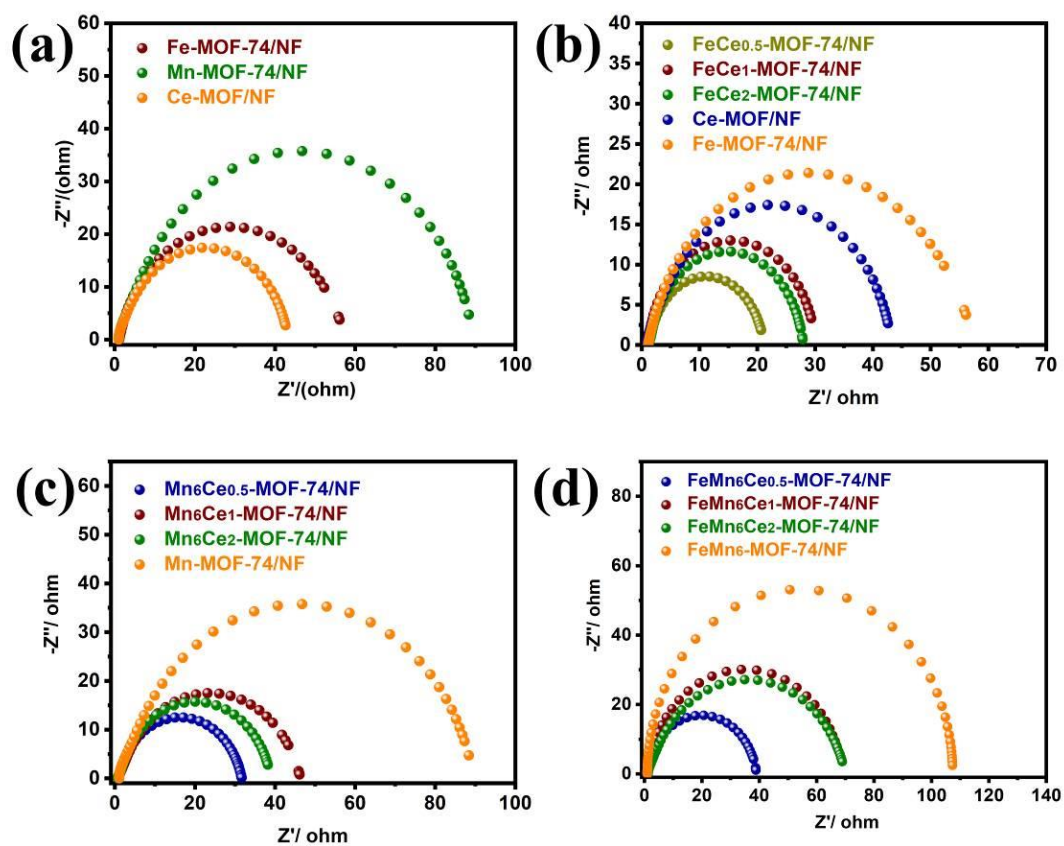

**Fig. S12** HER performances of all as-prepared materials in 1 M KOH. Nyquist plots of (a) single metal-MOF-74; (b) FeCe-MOF-74 series; (c) MnCe-MOF-74 series and (d) (FeMnCe)-MOF-74 series.

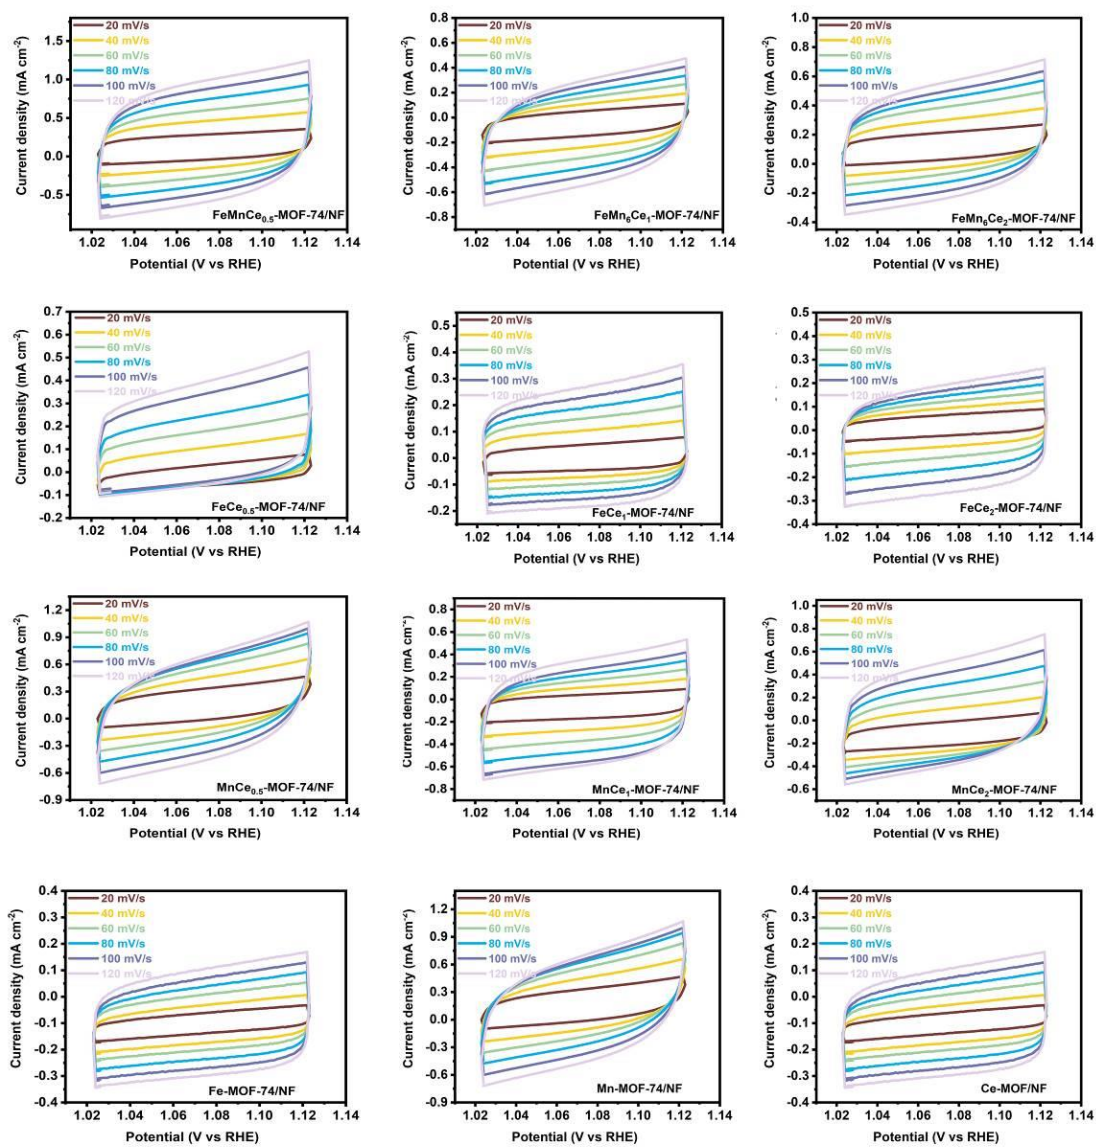

**Fig. S13** CV curves of all as-prepared materials at scan rates ranging from 20 to 120 mV/s

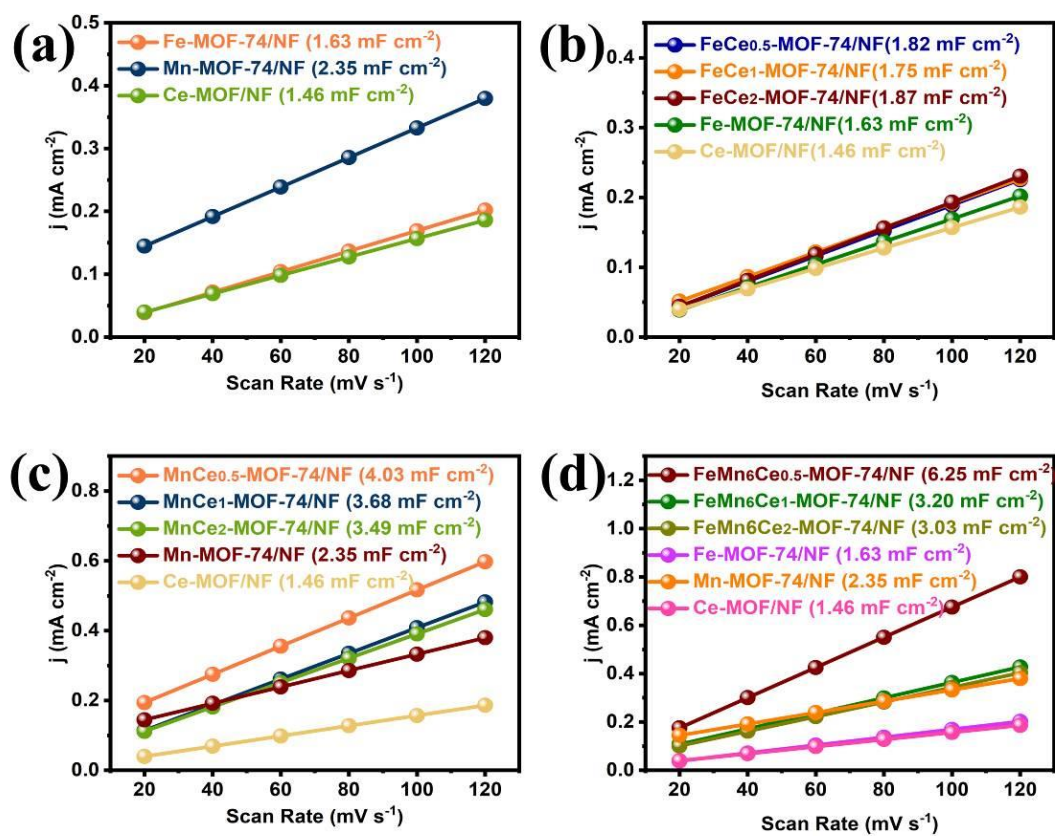

**Fig. S14**  $C_{dl}$  data of Nyquist plots of (a) single metal-MOF-74; (b) FeCe-MOF-74 series; (c) MnCe-MOF-74 series and (d) (FeMnCe)-MOF-74 series.

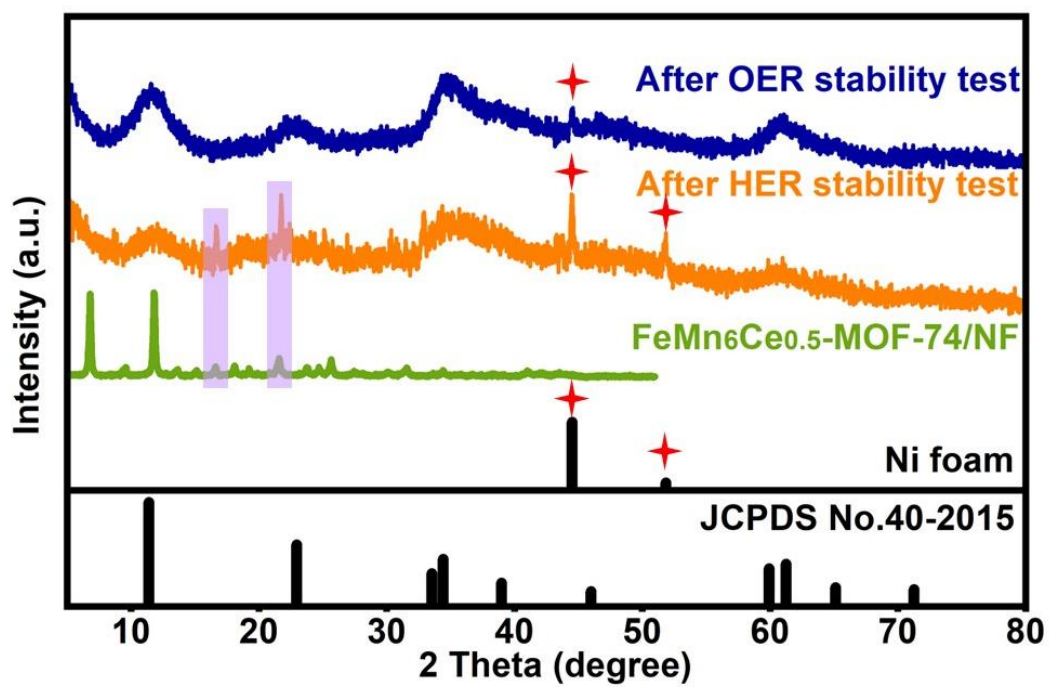

**Fig. S15** XRD patterns of the FeMn<sub>6</sub>Ce<sub>0.5</sub>-MOF-74/NF after the OER and HER for 24 h electrolysis process.



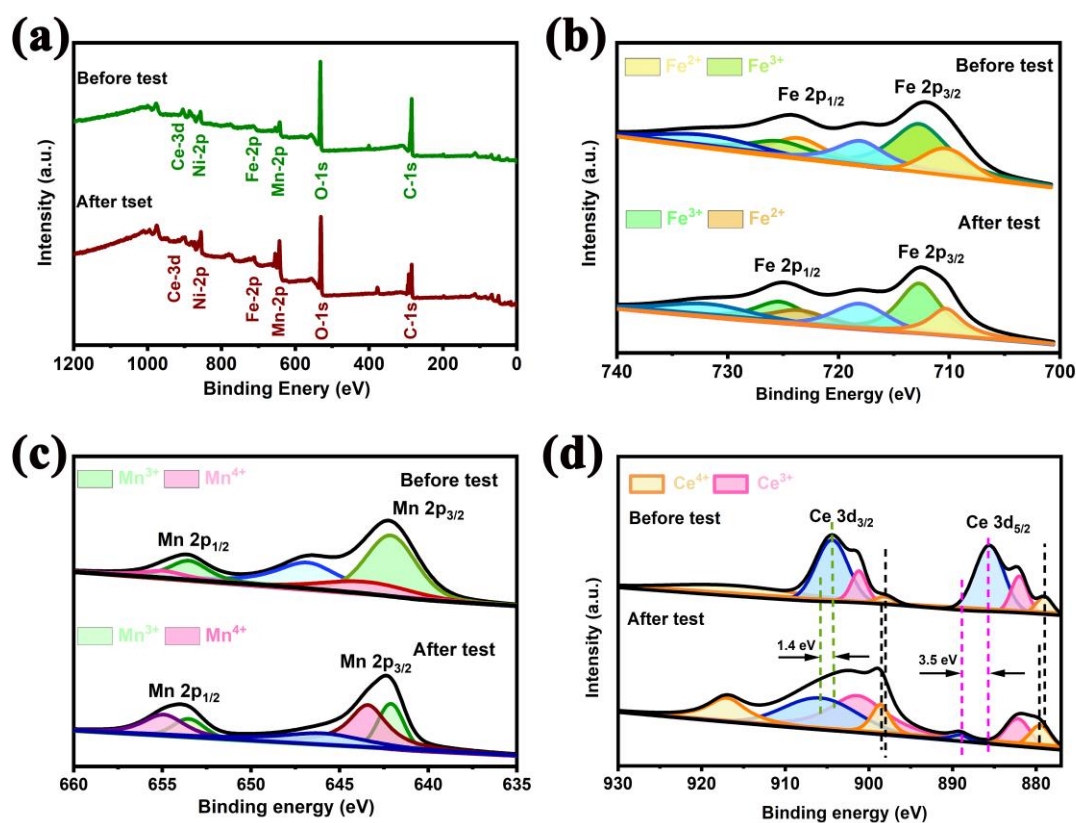

**Fig. S16** (a) XPS survey spectrum for FeMn<sub>6</sub>Ce<sub>0.5</sub>-MOF-74/NF before and after OER stability test. XPS analyses of Fe 2p (b), Mn 2p (c) and Ce 3d (d) before and after OER stability test.

In Fig. S16, showed the high-resolution Fe 2p, Mn 2p, and Ce 3d XPS spectra for FeMn<sub>6</sub>Ce<sub>0.5</sub>-MOF-74/NF before and after the OER stability test. Fe 2p spectrum in FeMn<sub>6</sub>Ce<sub>0.5</sub>-MOF-74/NF shows two pairs of peaks 712.3 eV (Fe 2p<sub>3/2</sub>), 725.3 eV (Fe 2p<sub>1/2</sub>) for Fe<sup>3+</sup> and 710.3 eV (Fe 2p<sub>3/2</sub>), 723.6 eV (Fe 2p<sub>1/2</sub>) for Fe<sup>2+</sup>, and two satellite peaks 718.0 eV and 731.7 eV.<sup>S1-3</sup> In the high-resolution Mn 2p region of FeMn<sub>6</sub>Ce<sub>0.5</sub>-MOF-74/NF, two main peaks centered at 642.4 eV (Mn 2p<sub>3/2</sub>) and 653.5 eV (Mn 2p<sub>1/2</sub>) with one satellite peaks. It could be deconvoluted to four characteristic peaks at 641.4 eV and 653.0 eV could be assigned to Mn<sup>2+</sup> and those at 653.7 eV with 642.9 eV correspond to the Mn<sup>3+</sup> species.<sup>S4-6</sup> The binding energies 645.6 eV satellite peaks also correspond to Mn<sup>2+</sup>. Moreover, in the 3d Ce spectrum, the two peaks that appeared at 882.0 eV and 901.4 eV are assigned to 3d<sub>5/2</sub> and 3d<sub>3/2</sub> of Ce<sup>3+</sup>, respectively. Then it had peaks at 898.1 eV, 915.8 eV, and 879.0 eV corresponding to Ce 3d<sub>3/2</sub> and Ce 3d<sub>5/2</sub> of Ce<sup>4+</sup>. In addition, 885.6 eV and 904.4 eV were two satellite peaks.<sup>S7-9</sup>



**Table S1.** Content of four metal species in FeMn<sub>6</sub>Ce<sub>0.5</sub>-MOF-74、FeMn<sub>6</sub>Ce<sub>1</sub>-MOF-74 and FeMn<sub>6</sub>Ce<sub>2</sub>-MOF-74 by ICP-OES tests

|                                         | Mass% |     |     | Atom%  |        |        |
|-----------------------------------------|-------|-----|-----|--------|--------|--------|
|                                         | Fe    | Mn  | Ce  | Fe     | Mn     | Ce     |
| <b>FeMn<sub>6</sub>Ce<sub>0.5</sub></b> | 3.7   | 5.8 | 3.3 | 0.0661 | 0.1055 | 0.0235 |
| <b>FeMn<sub>6</sub>Ce<sub>1</sub></b>   | 2.9   | 4.7 | 3.6 | 0.0512 | 0.0861 | 0.0258 |
| <b>FeMn<sub>6</sub>Ce<sub>2</sub></b>   | 2.5   | 5.3 | 8.9 | 0.0450 | 0.0966 | 0.0639 |

**Table S2.** The comparison of the OER activities of FeMn<sub>6</sub>Ce<sub>0.5</sub>-MOF-74/NF and other recently reported MOF-based catalysts.

| Catalyst                                                         | Overpotential<br>(mV@mA cm <sup>-2</sup> ) | Electrolyte      | Ref              |
|------------------------------------------------------------------|--------------------------------------------|------------------|------------------|
| CoNi-MOF-74                                                      | 300@100                                    | 0.1 M KOH        | 60               |
| Co <sub>0.6</sub> Fe <sub>0.4</sub> -MOF-74                      | 280@10                                     | 1.0 M KOH        | 46               |
| Co <sub>3</sub> O <sub>4</sub> @MOF-74                           | 285@50                                     | 1.0 M KOH        | 61               |
| FeMn-MOF/NF(1:1)                                                 | 290@50                                     | 1.0 M KOH        | 62               |
| Ni <sub>0.5</sub> Co <sub>1.5</sub> - bpy(PyM)                   | 256@10                                     | 1.0 M KOH        | 25               |
| Br-Ni-MOF(A)                                                     | 306@10                                     | 1.0 M KOH        | 20               |
| NiFe(20Ni)-MOF/NFF                                               | 297@100                                    | 1.0 M KOH        | 63               |
| Co <sub>3</sub> Cu-Ni <sub>2</sub> MOFs                          | 288@10                                     | 1.0 M KOH        | 64               |
| S/N-CMF@Fe <sub>x</sub> Co <sub>y</sub> Ni <sub>1-x-y</sub> -MOF | 296 @10                                    | 1.0 M KOH        | 11               |
| Mn-MOF/NF                                                        | 280@20                                     | 0.1 M KOH        | 30               |
| FeCoNi MOF/NF                                                    | 267@10                                     | 1.0 M KOH        | 65               |
| CdFe-MOF                                                         | 290@100                                    | 1.0 M KOH        | 66               |
| <b>FeMn<sub>6</sub>Ce<sub>0.5</sub>-MOF-74/NF</b>                | <b>281@100</b>                             | <b>1.0 M KOH</b> | <b>This work</b> |

## Reference

- S1. W. Zhou, Z. Xue, Q. Liu, Y. Li, J. Hu and G. Li, *ChemSusChem*, 2020, **13**, 5647-5653.
- S2. Q. Zha, M. Li, Z. Liu and Y. Ni, *ACS Sustainable Chem. Eng.*, 2020, **8**, 12025-12035.
- S3. J. Xing, K. Guo, Z. Zou, M. Cai, J. Du and C. Xu, *Chem. Commun.*, 2018, **54**, 7046-7049.
- S4. A. Goswami, D. Ghosh, D. Pradhan and K. Biradha, *ACS Appl. Mater. Interfaces*, 2022, **14**, 29722-29734.
- S5. T. Tang, W. J. Jiang, S. Niu, N. Liu, H. Luo, Y. Y. Chen, S. F. Jin, F. Gao, L. J. Wan and J. S. Hu, *J. Am. Chem. Soc.*, 2017, **139**, 8320-8328.
- S6. Y. Zhang, Z. Zeng and D. Ho, *Mater. Chem. Front.*, 2020, **4**, 1993-1999.
- S7. P. Liu, Y. Lu, W. Ma, L. Ma, Q. Liu, X. Zhang and J. Guo, *Sustainable Energy Fuels*, 2019, **3**, 3344-3351.
- S8. Y. Wang, S. Hao, X. Liu, Q. Wang, Z. Su, L. Lei and X. Zhang, *ACS Appl. Mater. Interfaces*, 2020, **12**, 37006-37012.
- S9. M. Dinari, H. Allami and M. M. Momeni, *J. Electroanal. Chem.*, 2020, **877**, 114643.
